# Supplementary material
Source: publisher site journal article supplement (https://www.dovepress.com/article/228890)
Supplement: Supplementary file 1 [file get_supplementary_file.php]

**Appendix 1. Patient Schema and patient script**


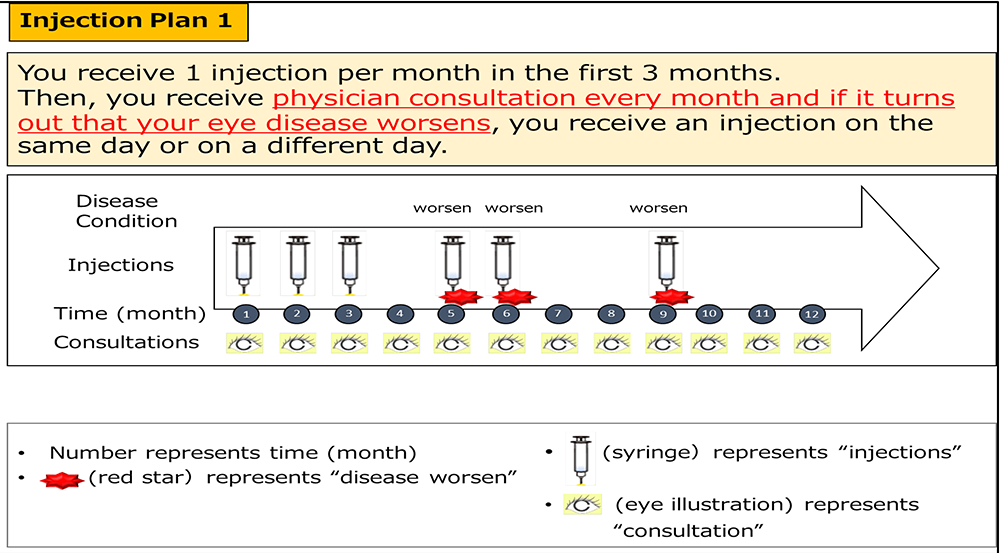


This is the option 1 of injection plan.

【Point to the description and read it】

You receive 1 injection per month in the first 3 months.

Then, you receive physician consultation every month and if it turns out that your eye disease worsens, you receive an injection on the same day or on a different day.

These chart/graphics show the injection plan.

【Point to the explanatory notes and the chart/graphics and explain】

- Numbers represent the time. It says 1 to 12, which mean Month 1 to 12.
- The red star represents the disease worsens.
- The syringe means you receive an injection in the month.
- The eye illustration means you have physician consultation in the month.

According to Injection Plan 1, you have physician consultations every month.

You receive injections every month in the first 3 month.

Then, according to this example, you receive injections in Month 5, 6 and 9 when the disease worsens (red star).


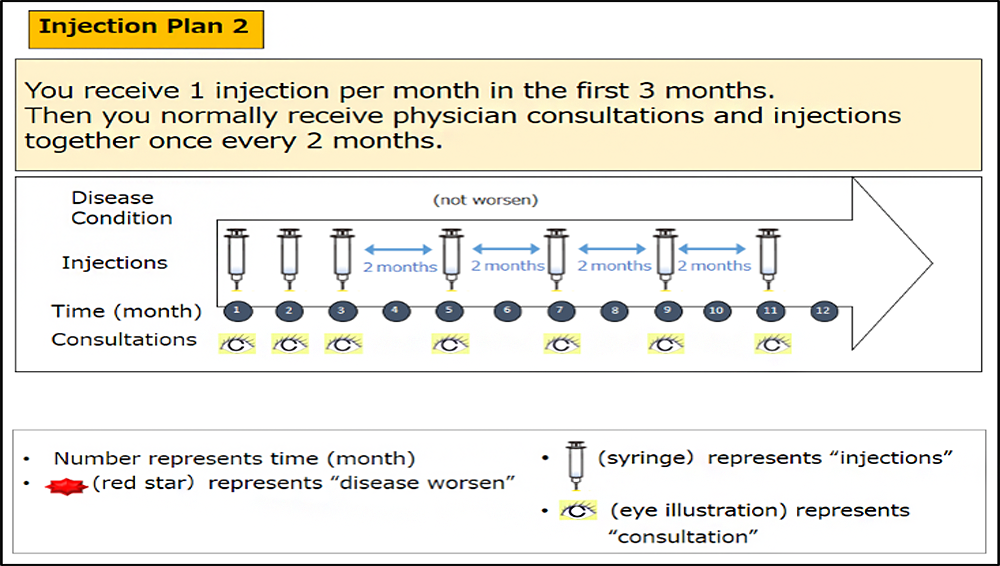


This is Injection Plan 2.

【Point to the description and read it】

You receive 1 injection per month in the first 3 months.

Then you normally receive physician consultations and injections together once every 2 months.

In this injection plan, it is not that you receive injections when your eye disease worsens as you do in Injection Plan 1, but the goal is to prevent disease progression and loss of visual acuity by doing injections for prevention with fixed intervals even if the disease does not worsen.

These chart/graphics show the injection plan.

【Point to explanatory notes & chart/graphics and explain】

- Same as the previous one, numbers represent Month 1-12, syringe represents injection and eye illustration represents physician consultation.

According to Injection Plan 2, you receive physician consultations and injections every month in the first 3 months.

Then, in this example, you receive physician consultations and injections once every 2 months.

You receive injections for prevention even if the disease does not worsen (there is no red star).


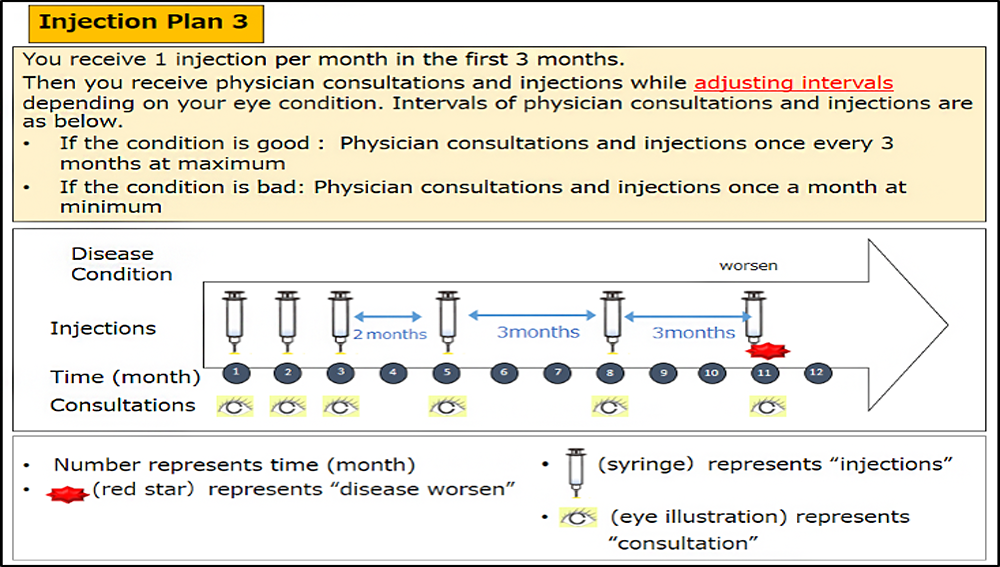


This is Injection Plan 3.

【Point to the description and read it】

You receive 1 injection per month in the first 3 months.

Then you receive physician consultations and injections while adjusting intervals depending on your eye condition. Intervals of physician consultations and injections are as below.

- If the condition is good: Physician consultations and injections once every 3 months at maximum
- If the condition is bad: Physician consultations and injections once a month at minimum

In this injection plan, you do not receive injections when the disease worsens, but the goal is to prevent disease progression and loss of visual acuity. The intervals of physician consultations and injections are adjusted depending on your eye condition.

These chart/graphics show the injection plan.

【Point to explanatory notes & chart/graphics and explain】

- Same as the previous ones, numbers represent Month 1-12, syringe represents injection, eye illustration represents physician consultation and red star represents the disease worsens.

According to Injection Plan 3, you receive physician consultations and injections every month in the first 3 months.

Then, you receive injections for prevention while adjusting intervals depending on your eye condition.

In this example, the disease does not worsen (there is no red star), so you receive physician consultations and injections for prevention in 2 months, Month 5, then in 3 months, Month 8 and in another 3 months, Month 11.

In Month 11, the vision gets worse (red line declines) and the disease worsens (red star), so you will receive physician consultations and injections with a shorter interval after that.

Appendix 2. patient QUESTIONNAIRE

The following survey will be about injections of your wet age-related macular degeneration (wAMD) which is a chronic eye disease that causes blurred vision, reduced central vision or a blind spot in your visual field. Please read each question carefully and provide a response for every question.

**Features of Injections for wet age-related macular degeneration (your eye condition)**

Medicines for wet age-related macular degeneration can help symptoms from getting worse and improve your vision. The major treatments are given as an injection in your eye. Depending on the injection plan you determine with your physician in charge, the number of visits to your physician, number of injections and the degree to which your vision improves will vary. In this survey, we will ask you to think about the following injection features that will be described to you:

- Injection plan
- How many injections in the first 12 months of treatment
- Number of required physician consultations in the first 12 months of treatment
- Chance of vision improving markedly after 12 months of treatment

Chance of vision improvement remaining after 2 years of treatment
